# Supplementary material for: UV and visible light photocatalytic activity of Au/TiO2 nanoforests with Anatase/Rutile phase junctions and controlled Au locations
Source: PubMed Central journal article supplement (PMC5259751; doi:10.1038/srep41253), 2017-01-24
Supplement: srep41253-s1.pdf [file srep41253-s1.pdf]

**Electronic Supplementary Information for**

**UV and Visible Light Photocatalytic Activity of Au/TiO<sub>2</sub>  
Nanoforests with Anatase/Rutile Phase Junctions and Controlled  
Au Locations**

Yang Yu, Wei Wen, Xin-Yue Qian, Jia-Bin Liu and Jin-Ming Wu\*

*State Key Laboratory of Silicon Materials and School of Materials Science and Engineering,*

*Zhejiang University, Hangzhou 310027, P. R. China.*

*College of Mechanical and Electrical Engineering, Hainan University, Haikou, 570228, P. R.*

*China.*

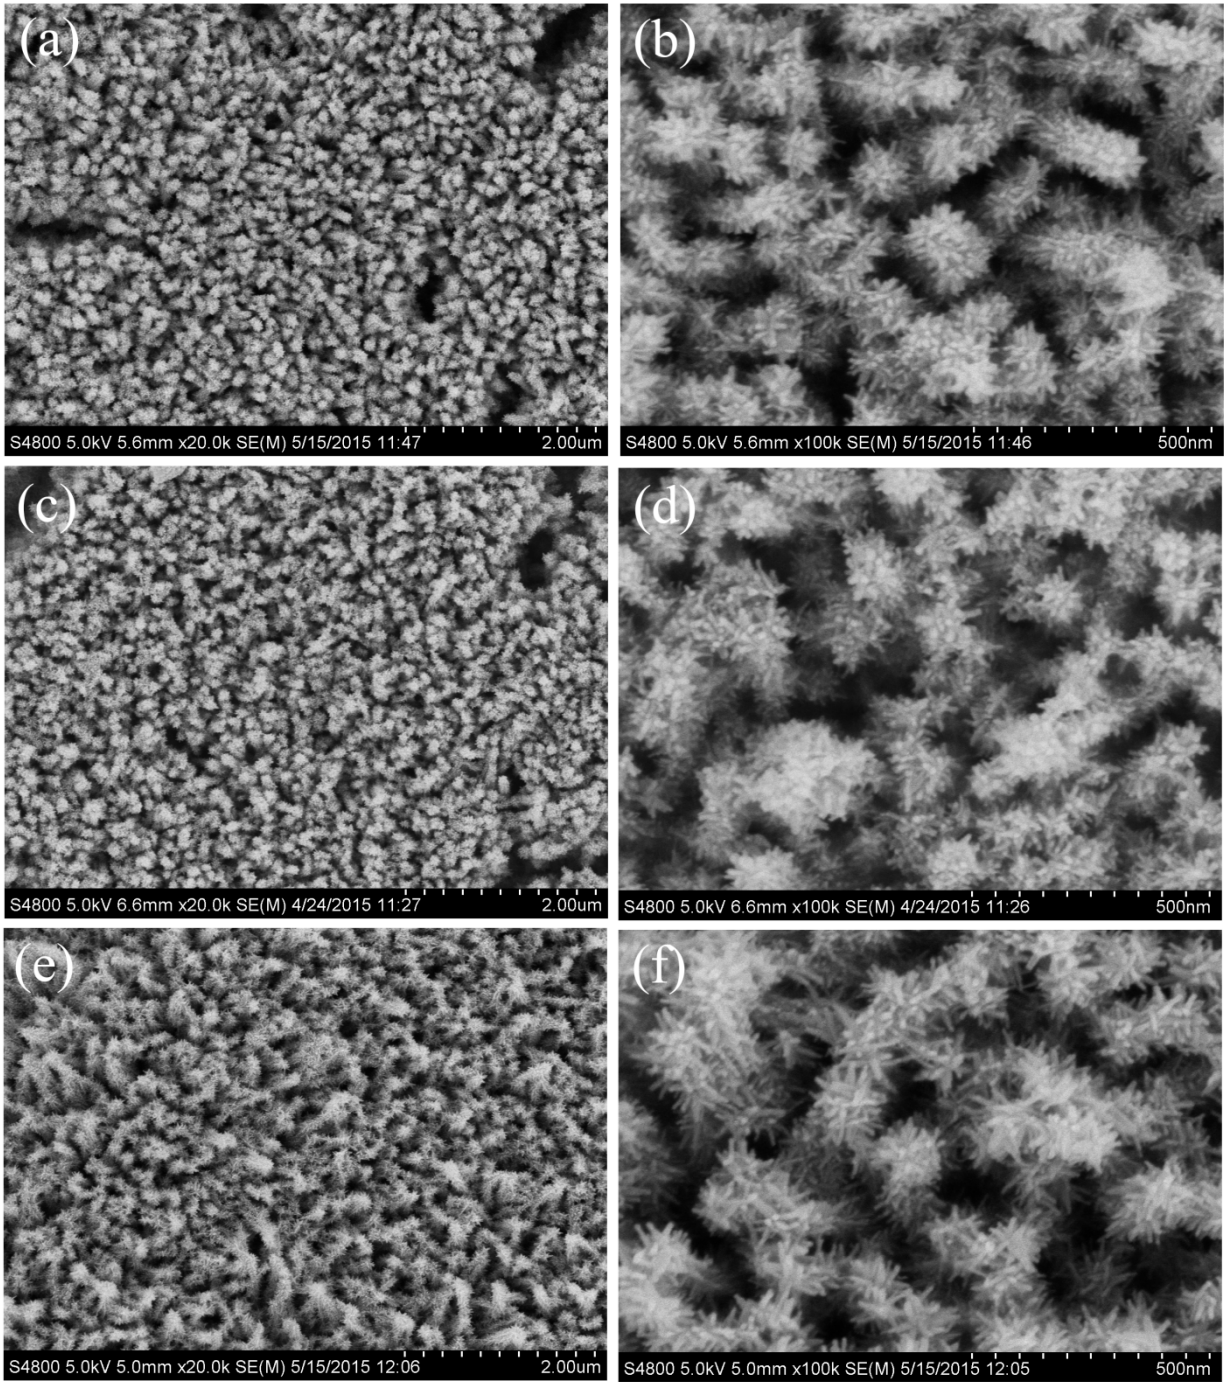

**Figure S1.** Low and high magnification top view FESEM images of the Branched-NW (a, b), Branched-NW-Au (c, d), and Branched-Au-NW (e, f).

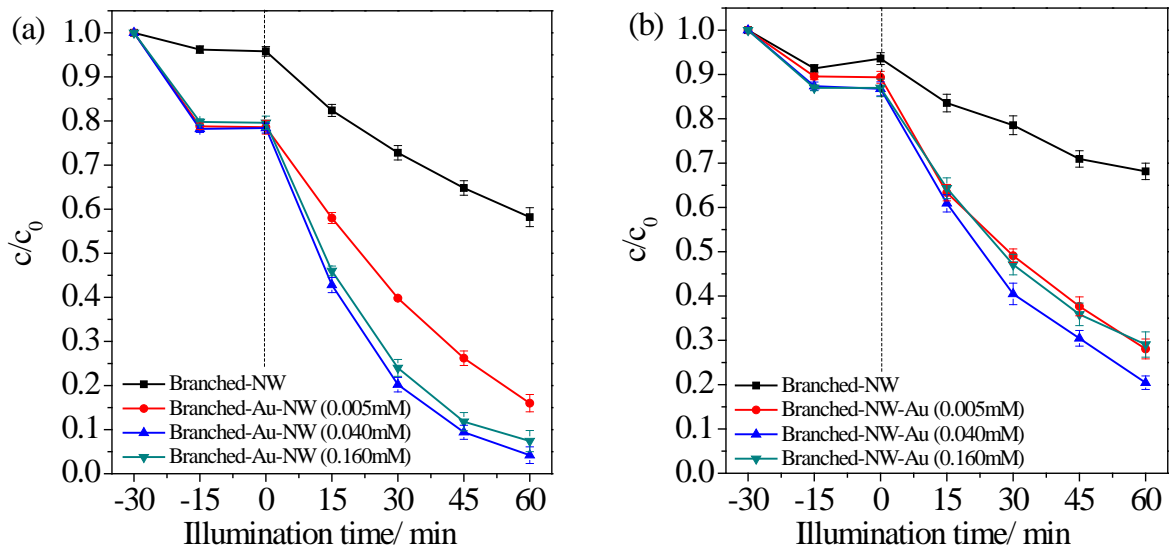

**Figure S2.** Photodegradation curves of rhodamine B in water under UV light illumination, in the presence of (a) the Branched-NW-Au and (b) Branched-Au-NW, for which the Au-loading was achieved using  $\text{HAuCl}_4$  solutions with various concentrations.

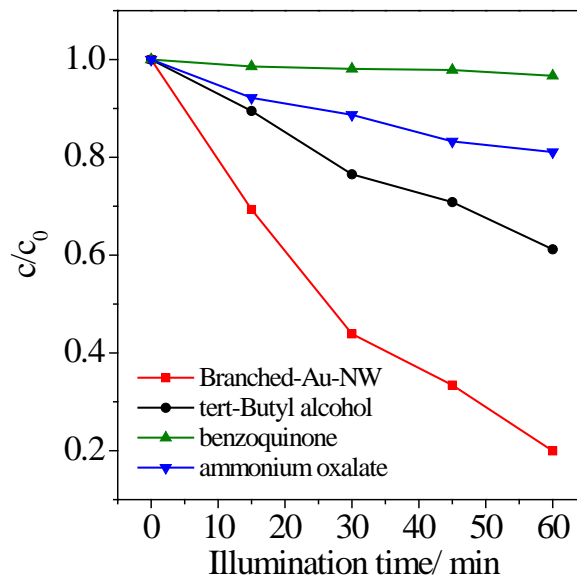

**Figure S3.** The effects of different quenching agents on the photodegradation procedures of rhodamine B in water in the presence of the Branched-Au-NW under the UV light illumination.

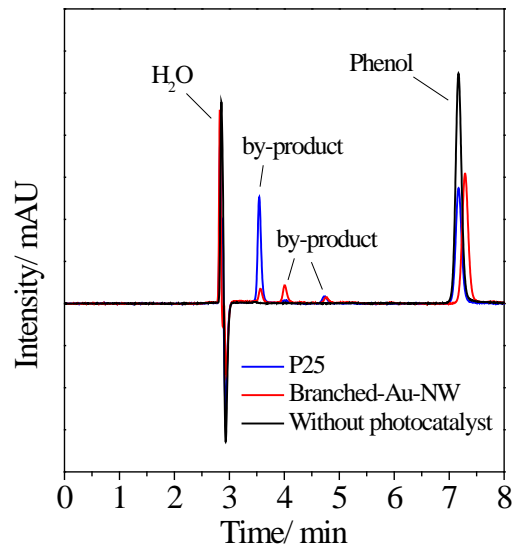

**Figure S4.** The LC spectra of phenol under the UV light illumination for 6 h, in absence and in the presence of the P25 film and the Branched-Au-NW.

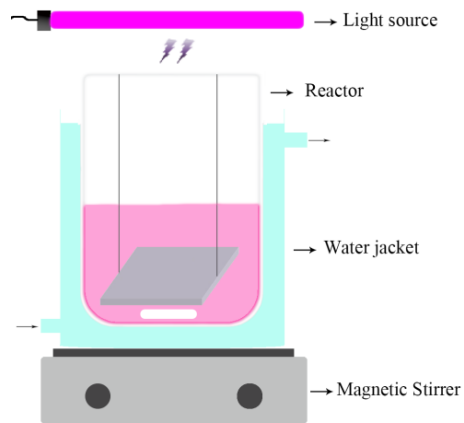

**Figure S5.** The schematic image showing the set-up of the photocatalytic tests.
